# Supplementary material for: miRandola 2017: a curated knowledge base of non-invasive biomarkers
Source: PubMed Central journal article supplement — Nucleic Acids Res. 2017 Sep 25;46(Database issue):D354–9. doi: 10.1093/nar/gkx854 (PMC5753291; doi:10.1093/nar/gkx854), 2017-09-25
Supplement: gkx854_supp.pdf [file gkx854_supp.pdf]

# Supplementary information

## miRandola 2017: a curated knowledge base of non-invasive biomarkers

Francesco Russo<sup>1,\*</sup>, Sebastiano Di Bella<sup>2</sup>, Federica Vannini<sup>3,#</sup>, Gabriele Berti<sup>3,#</sup>, Flavia Scoyni<sup>4,#</sup>, Helen Victoria Cook<sup>1</sup>, Alberto Santos<sup>1,5</sup>, Giovanni Nigita<sup>6</sup>, Vincenzo Bonnici<sup>7</sup>, Alessandro Laganà<sup>8</sup>, Filippo Geraci<sup>9</sup>, Alfredo Pulvirenti<sup>10</sup>, Rosalba Giugno<sup>7</sup>, Federico De Masi<sup>11</sup>, Kirstine Belling<sup>1</sup>, Lars Juhl Jensen<sup>1</sup>, Søren Brunak<sup>1</sup>, Marco Pellegrini<sup>9</sup> and Alfredo Ferro<sup>10</sup>

<sup>1</sup> Disease Systems Biology, Novo Nordisk Foundation Center for Protein Research, Faculty of Health and Medical Sciences, University of Copenhagen, Copenhagen, Denmark;

<sup>2</sup> Business Unit Oncology, Nerviano Medical Sciences, Milan, Italy;

<sup>3</sup> Institute of Clinical Physiology (IFC), National Research Council (CNR), Pisa, Italy;

<sup>4</sup> University of Eastern Finland, Kuopio, Finland;

<sup>5</sup> Clinical Proteomics, Novo Nordisk Foundation Center for Protein Research, Faculty of Health and Medical Sciences, University of Copenhagen, Copenhagen, Denmark;

<sup>6</sup> Department of Cancer Biology and Genetics, The Ohio State University, Ohio, USA;

<sup>7</sup> Department of Computer Science, University of Verona, Verona, Italy;

<sup>8</sup> Department of Genetics and Genomic Sciences, Icahn School of Medicine at Mount Sinai, NYC, USA;

<sup>9</sup> Institute of Informatics and Telematics (IIT), National Research Council (CNR), Pisa, Italy;

<sup>10</sup> Department of Clinical and Experimental Medicine, University of Catania, Catania, Italy;

<sup>11</sup> Department of Bio and Health Informatics, DTU Bioinformatics, Technical University of Denmark, Lyngby, Denmark.

\* To whom correspondence should be addressed. Tel: +45 35325000; Email: [francesco.russo@cpr.ku.dk](mailto:francesco.russo@cpr.ku.dk)

#These authors contributed equally to this work.

**Supplementary table.** List of papers (n=314) included in miRandola 2017.

| <b>First author</b>       | <b>Title</b>                                                                                                                                           | <b>Journal</b>                              | <b>Year of publication</b> | <b>PubMed ID</b>         |
|---------------------------|--------------------------------------------------------------------------------------------------------------------------------------------------------|---------------------------------------------|----------------------------|--------------------------|
| Hou S et al.              | MicroRNA-939 governs vascular integrity and angiogenesis through targeting $\gamma$ -catenin in endothelial cells.                                     | Biochem Biophys Res Commun. 26;484(1):27-33 | 2017                       | <a href="#">28115160</a> |
| Ishikawa H et al.         | Stability of serum high-density lipoprotein-microRNAs for preanalytical conditions.                                                                    | Ann Clin Biochem. 54(1):134-142             | 2017                       | <a href="#">27166305</a> |
| Kim SS et al.             | Plasma microRNA-122 as a predictive marker for treatment response following transarterial chemoembolization in patients with hepatocellular carcinoma. | J Gastroenterol Hepatol. 32(1):199-207      | 2017                       | <a href="#">27194671</a> |
| Al-Kafaji G et al.        | Circulating endothelium-enriched microRNA-126 as a potential biomarker for coronary artery disease in type 2 diabetes mellitus patients.               | Biomarkers. 11:1-11                         | 2016                       | <a href="#">27321479</a> |
| Binderup HG et al.        | Aspirin resistance may be identified by miR-92a in plasma combined with platelet distribution width.                                                   | Clin Biochem. 49(15):1167-1172              | 2016                       | <a href="#">27208561</a> |
| Chien HY et al.           | Differential microRNA Profiles Predict Diabetic Nephropathy Progression in Taiwan.                                                                     | Int J Med Sci. 13(6):457-65                 | 2016                       | <a href="#">27279796</a> |
| de Gonzalo-Calvo D et al. | microRNA expression profile in human coronary smooth muscle cell-derived microparticles is a source of biomarkers.                                     | Clin Investig Arterioscler. 28(4):167-77    | 2016                       | <a href="#">27363781</a> |
| Ding E et al.             | Plasma microRNAs expression profile in female workers occupationally exposed to mercury.                                                               | J Thorac Dis. 8(5):833-41                   | 2016                       | <a href="#">27162656</a> |
| He QF et al.              | Circulating MicroRNA-21 is Downregulated in Patients with Metabolic Syndrome.                                                                          | Biomed Environ Sci. 2016 May;29(5):385-9    | 2016                       | <a href="#">27353714</a> |
| Hoffmann S et al.         | Coding and non-coding variants in the SHOX2 gene in patients with early-onset atrial fibrillation.                                                     | Basic Res Cardiol. 111(3):36                | 2016                       | <a href="#">27138930</a> |
| Hruskova V et al.         | MicroRNA-125b: association with disease activity and the treatment response of patients with early rheumatoid arthritis.                               | Arthritis Res Ther. 18(1):124               | 2016                       | <a href="#">27255643</a> |
| Ioannidis J et al.        | Circulating microRNA Profiles during the Bovine Oestrous Cycle.                                                                                        | PLoS One. 11(6):e0158160                    | 2016                       | <a href="#">27340826</a> |
| Kaneko M et al.           | AT1 receptor blocker azilsartan medoxomil normalizes plasma miR-146a and miR-342-3p in a murine heart failure model.                                   | Biomarkers. 11:1-8                          | 2016                       | <a href="#">27321284</a> |
| Karakas M et al.          | Circulating microRNAs strongly predict cardiovascular death in patients with coronary artery disease-results from the large AtheroGene study.          | Eur Heart J. pii: ehw250                    | 2016                       | <a href="#">27357355</a> |

|                     |                                                                                                                                           |                                    |      |                          |
|---------------------|-------------------------------------------------------------------------------------------------------------------------------------------|------------------------------------|------|--------------------------|
| Ke-Gang J et al.    | Evaluating Diagnostic and Prognostic Value of Plasma miRNA133a in Acute Chest Pain Patients Undergoing Coronary Angiography.              | Medicine (Baltimore). 95(17):e3412 | 2016 | <a href="#">27124025</a> |
| Kessler T et al.    | Serum microRNA-1233 is a specific biomarker for diagnosing acute pulmonary embolism.                                                      | J Transl Med. 14(1):120            | 2016 | <a href="#">27150028</a> |
| Khalyfa A et al.    | Extracellular microvesicle microRNAs in children with sickle cell anaemia with divergent clinical phenotypes.                             | Br J Haematol. 174(5):786-98       | 2016 | <a href="#">27161653</a> |
| Kho AT et al.       | Circulating MicroRNAs: Association with Lung Function in Asthma.                                                                          | PLoS One. 11(6):e0157998           | 2016 | <a href="#">27362794</a> |
| Knyazev EN et al.   | Plasma Levels of hsa-miR-619-5p and hsa-miR-1184 Differ in Prostatic Benign Hyperplasia and Cancer.                                       | Bull Exp Biol Med. 161(1):108-11   | 2016 | <a href="#">27265125</a> |
| Miura K et al.      | Circulating Levels of Pregnancy-Associated, Placenta-Specific microRNAs in Pregnant Women With Placental Abruption.                       | Reprod Sci. pii: 1933719116653837  | 2016 | <a href="#">27297699</a> |
| Montagnana M et al. | Plasma Expression Levels of Circulating miR-21 are not Useful for Diagnosing and Monitoring Colorectal Cancer.                            | Clin Lab. 62(5):967-70             | 2016 | <a href="#">27349026</a> |
| Nagamitsu Y et al.  | Profiling analysis of circulating microRNA expression in cervical cancer.                                                                 | Mol Clin Oncol. 5(1):189-194       | 2016 | <a href="#">27330796</a> |
| Saito K et al.      | MicroRNA-93 may control vascular endothelial growth factor A in circulating peripheral blood mononuclear cells in acute Kawasaki disease. | Pediatr Res. 80(3):425-32          | 2016 | <a href="#">27089500</a> |
| Salamin O et al.    | Circulating microRNA-122 as Potential Biomarker for Detection of Testosterone Abuse.                                                      | PLoS One. 11(5):e0155248           | 2016 | <a href="#">27171140</a> |
| Vistbakka J et al.  | Circulating microRNAs as biomarkers in progressive multiple sclerosis.                                                                    | Mult Scler. pii: 1352458516651141  | 2016 | <a href="#">27246141</a> |
| Wang X et al.       | Diagnostic potential of plasma microRNA signatures in patients with deep-vein thrombosis.                                                 | Thromb Haemost. 116(2):328-36      | 2016 | <a href="#">27197074</a> |
| Weilner S et al.    | Secreted microvesicular miR-31 inhibits osteogenic differentiation of mesenchymal stem cells.                                             | Aging Cell. 15(4):744-54           | 2016 | <a href="#">27146333</a> |
| Zhang L et al.      | Circulating MicroRNA-21 Is Involved in Lymph Node Metastasis in Cervical Cancer by Targeting RAS1.                                        | Int J Gynecol Cancer. 26(5):810-6  | 2016 | <a href="#">27101583</a> |
| Beyer C et al.      | Signature of circulating microRNAs in osteoarthritis.                                                                                     | Ann Rheum Dis. 74(3):e18.          | 2015 | <a href="#">24515954</a> |
| Chen Z et al.       | Oxidative stress activates endothelial innate immunity via sterol regulatory element binding protein 2                                    | Circulation. 131(9):805-14.        | 2015 | <a href="#">25550450</a> |

|                           |                                                                                                                                                                                                         |                                 |      |                          |
|---------------------------|---------------------------------------------------------------------------------------------------------------------------------------------------------------------------------------------------------|---------------------------------|------|--------------------------|
|                           | (SREBP2) transactivation of microRNA-92a.                                                                                                                                                               |                                 |      |                          |
| Csak T et al.             | microRNA-122 regulates hypoxia-inducible factor-1 and vimentin in hepatocytes and correlates with fibrosis in diet-induced steatohepatitis.                                                             | Liver Int. 35(2):532-41.        | 2015 | <a href="#">25040043</a> |
| de Guia RM et al.         | microRNA-379 couples glucocorticoid hormones to dysfunctional lipid homeostasis.                                                                                                                        | EMBO J. 34(3):344-60.           | 2015 | <a href="#">25510864</a> |
| Duan LJ et al.            | MiR-133 modulates TGF-beta-1-induced bladder smooth muscle cell hypertrophic and fibrotic response: implication for a role of microRNA in bladder wall remodeling caused by bladder outlet obstruction. | Cell Signal. 27(2):215-27.      | 2015 | <a href="#">25451078</a> |
| Fong MY et al.            | Breast-cancer-secreted miR-122 reprograms glucose metabolism in premetastatic niche to promote metastasis.                                                                                              | Nat Cell Biol. 17(2):183-94.    | 2015 | <a href="#">25621950</a> |
| Hansen TF et al.          | Changes in circulating microRNA-126 during treatment with chemotherapy and bevacizumab predicts treatment response in patients with metastatic colorectal cancer.                                       | Br J Cancer. 112(4):624-9.      | 2015 | <a href="#">25584492</a> |
| Hu Y et al.               | Circulating microRNA profiles and the identification of miR-593 and miR-511 which directly target the PROP1 gene in children with combined pituitary hormone deficiency.                                | Int J Mol Med. 35(2):358-66.    | 2015 | <a href="#">25434367</a> |
| Kacperska MJ et al.       | Selected Extracellular microRNA as Potential Biomarkers of Multiple Sclerosis Activity-Preliminary Study.                                                                                               | J Mol Neurosci. 56(1):154-63.   | 2015 | <a href="#">25487315</a> |
| Kleivi Sahlberg K et al.  | A serum microRNA signature predicts tumor relapse and survival in triple-negative breast cancer patients.                                                                                               | Clin Cancer Res. 21(5):1207-14. | 2015 | <a href="#">25547678</a> |
| Kubiczkova Besse L et al. | Combination of serum microRNA-320a and microRNA-320b as a marker for Waldenström macroglobulinemia.                                                                                                     | Am J Hematol. 90(3):E51-2.      | 2015 | <a href="#">25428891</a> |
| Løvendorf MB et al.       | Laser capture microdissection followed by next-generation sequencing identifies disease-related microRNAs in psoriatic skin that reflect systemic microRNA changes in psoriasis.                        | Exp Dermatol. 24(3):187-93.     | 2015 | <a href="#">25431026</a> |
| Li Q et al.               | Plasma long noncoding RNA protected by exosomes as a potential stable biomarker for gastric cancer.                                                                                                     | Tumour Biol. 36(3):2007-12.     | 2015 | <a href="#">25391424</a> |
| Liu P et al.              | MicroRNA-424 protects against focal cerebral ischemia and reperfusion injury in mice by suppressing oxidative stress.                                                                                   | Stroke. 46(2):513-9.            | 2015 | <a href="#">25523055</a> |

|                        |                                                                                                                                                              |                                   |      |                          |
|------------------------|--------------------------------------------------------------------------------------------------------------------------------------------------------------|-----------------------------------|------|--------------------------|
| Lorenzen JM et al.     | Circulating long noncoding RNATapSaki is a predictor of mortality in critically ill patients with acute kidney injury.                                       | Clin Chem. 61(1):191-201.         | 2015 | <a href="#">25294924</a> |
| Lu YC et al.           | Combined determination of circulating miR-196a and miR-196b levels produces high sensitivity and specificity for early detection of oral cancer.             | Clin Biochem. 48(3):115-21.       | 2015 | <a href="#">25485932</a> |
| Memczak S et al.       | Identification and Characterization of Circular RNAs As a New Class of Putative Biomarkers in Human Blood.                                                   | PLoS One. 10(10):e0141214.        | 2015 | <a href="#">26485708</a> |
| Odenthal M et al.      | Serum microRNA profiles as prognostic/predictive markers in the multimodality therapy of locally advanced adenocarcinomas of the gastroesophageal junction.  | Int J Cancer. 137(1):230-7.       | 2015 | <a href="#">25429911</a> |
| Pirola CJ et al.       | Circulating microRNA signature in non-alcoholic fatty liver disease: from serum non-coding RNAs to liver histology and disease pathogenesis.                 | Gut. 64(5):800-12.                | 2015 | <a href="#">24973316</a> |
| Pontoppidan PL et al.  | Associations between gastrointestinal toxicity, micro RNA and cytokine production in patients undergoing myeloablative allogeneic stem cell transplantation. | Int Immunopharmacol. 25(1):180-8. | 2015 | <a href="#">25614225</a> |
| Shen L et al.          | Circulating microRNA predicts insensitivity to glucocorticoid therapy in Graves' ophthalmopathy.                                                             | Endocrine.                        | 2015 | <a href="#">25588771</a> |
| Soeki T et al.         | Plasma microRNA-100 is associated with coronary plaque vulnerability.                                                                                        | Circ J. 79(2):413-8.              | 2015 | <a href="#">25519160</a> |
| Stamatopoulos B et al. | Opposite prognostic significance of cellular and serum circulating microRNA-150 in Chronic Lymphocytic Leukemia patients.                                    | Mol Med. [Epub ahead of print]    | 2015 | <a href="#">25584781</a> |
| Sun L et al.           | Expression of circulating microRNA-1 and microRNA-133 in pediatric patients with tachycardia.                                                                | Mol Med Rep. 11(6):4039-46.       | 2015 | <a href="#">25625292</a> |
| Tong YS et al.         | Identification of the long non-coding RNA POU3F3 in plasma as a novel biomarker for diagnosis of esophageal squamous cell carcinoma.                         | Mol Cancer. 14(1):3.              | 2015 | <a href="#">25608466</a> |
| Tsujiura M et al.      | Circulating miR-18a in plasma contributes to cancer detection and monitoring in patients with gastric cancer.                                                | Gastric Cancer. 18(2):271-9.      | 2015 | <a href="#">24626859</a> |
| Wang R et al.          | Elevated circulating microRNA-122 is associated with obesity and insulin resistance in young adults.                                                         | Eur J Endocrinol. 172(3):291-300. | 2015 | <a href="#">25515554</a> |
| Wang Y et al.          | Profiles of differential expression of circulating microRNAs in hepatitis B virus-positive small hepatocellular carcinoma.                                   | Cancer Biomark. 15(2):177-86.     | 2015 | <a href="#">25519019</a> |

|                           |                                                                                                                                                  |                                             |      |                          |
|---------------------------|--------------------------------------------------------------------------------------------------------------------------------------------------|---------------------------------------------|------|--------------------------|
| Wong LL et al.            | Circulating microRNAs in heart failure with reduced and preserved left ventricular ejection fraction.                                            | Eur J Heart Fail. 17(4):393-404.            | 2015 | <a href="#">25619197</a> |
| Zhang H et al.            | Investigation of microRNA expression in human serum during the aging process.                                                                    | J Gerontol A Biol Sci Med Sci. 70(1):102-9. | 2015 | <a href="#">25165030</a> |
| Zuo K et al.              | A dysregulated microRNA-26a/EphA2 axis impairs endothelial progenitor cell function via the p38 MAPK/VEGF pathway.                               | Cell Physiol Biochem. 35(2):477-88.         | 2015 | <a href="#">25613580</a> |
| Achberger S et al.        | Circulating immune cell and microRNA in patients with uveal melanoma developing metastatic disease.                                              | Mol Immunol. 58(2):182-6.                   | 2014 | <a href="#">24370793</a> |
| Akao Y et al.             | Extracellular disposal of tumor-suppressor miRs-145 and -34a via microvesicles and 5-FU resistance of human colon cancer cells.                  | Int J Mol Sci. 15(1):1392-401.              | 2014 | <a href="#">24447928</a> |
| Badrnya S et al.          | Smoking alters circulating plasma microvesicle pattern and microRNA signatures.                                                                  | Thromb Haemost. 112(1):128-36.              | 2014 | <a href="#">24573468</a> |
| Balakathiresan NS et al.  | Serum and amygdala microRNA signatures of posttraumatic stress: fear correlation and biomarker potential.                                        | J Psychiatr Res. 57:65-73.                  | 2014 | <a href="#">24998397</a> |
| Balaraman S et al.        | Maternal and neonatal plasma microRNA biomarkers for fetal alcohol exposure in an ovine model.                                                   | Alcohol Clin Exp Res. 38(5):1390-400.       | 2014 | <a href="#">24588274</a> |
| Basati G et al.           | Elevated level of microRNA-21 in the serum of patients with colorectal cancer.                                                                   | Med Oncol. 31(10):205.                      | 2014 | <a href="#">25178939</a> |
| Bhatnagar S et al.        | Increased microRNA-34c abundance in Alzheimer's disease circulating blood plasma.                                                                | Front Mol Neurosci. 7:2.                    | 2014 | <a href="#">24550773</a> |
| Bijkerk R et al.          | Silencing of miRNA-126 in kidney ischemia reperfusion is associated with elevated SDF-1 levels and mobilization of Sca-1+/Lin- progenitor cells. | Microna. 3(3):144-9.                        | 2014 | <a href="#">25541911</a> |
| Biros E et al.            | microRNA profiling in patients with abdominal aortic aneurysms: the significance of miR-155.                                                     | Clin Sci (Lond). 126(11):795-803.           | 2014 | <a href="#">24283299</a> |
| Borgonio Cuadra VM et al. | Altered expression of circulating microRNA in plasma of patients with primary osteoarthritis and in silico analysis of their pathways.           | PLoS One. 9(6):e97690                       | 2014 | <a href="#">24901787</a> |
| Bronisz A et al.          | Extracellular vesicles modulate the glioblastoma microenvironment via a tumor suppression signaling network directed by miR-1.                   | Cancer Res. 74(3):738-50.                   | 2014 | <a href="#">24310399</a> |
| Cantara S et al.          | Circulating miRNA95 and miRNA190 are sensitive markers for the differential diagnosis of thyroid nodules in a Caucasian population.              | J Clin Endocrinol Metab. 99(11):4190-8.     | 2014 | <a href="#">25057879</a> |
| Cao R et al.              | Xuezhikang therapy increases miR-33 expression in patients with low HDL-C levels.                                                                | Dis Markers. 2014:781780                    | 2014 | <a href="#">24591767</a> |

|                           |                                                                                                                                                                          |                                         |      |                          |
|---------------------------|--------------------------------------------------------------------------------------------------------------------------------------------------------------------------|-----------------------------------------|------|--------------------------|
| Chen D et al.             | Cancer affects microRNA expression, release, and function in cardiac and skeletal muscle.                                                                                | Cancer Res. 74(16):4270-81.             | 2014 | <a href="#">24980554</a> |
| Chen W et al.             | Clinical significance and detection of microRNA-21 in serum of patients with diffuse large B-cell lymphoma in Chinese population.                                        | Eur J Haematol. 92(5):407-12.           | 2014 | <a href="#">24400911</a> |
| Cheng L et al.            | Characterization and deep sequencing analysis of exosomal and non-exosomal miRNA in human urine.                                                                         | Kidney Int. 86(2):433-44                | 2014 | <a href="#">24352158</a> |
| Clarke JD et al.          | Circulating microRNA 122 in the methionine and choline-deficient mouse model of non-alcoholic steatohepatitis.                                                           | J Appl Toxicol. 34(6):726-32.           | 2014 | <a href="#">24217942</a> |
| Duong Van Huyen JP et al. | MicroRNAs as non-invasive biomarkers of heart transplant rejection.                                                                                                      | Eur Heart J. 35(45):3194-202.           | 2014 | <a href="#">25176944</a> |
| El-Garem H et al.         | Circulating microRNA, miR-122 and miR-221 signature in Egyptian patients with chronic hepatitis C related hepatocellular carcinoma.                                      | World J Hepatol. 6(11):818-24.          | 2014 | <a href="#">25429320</a> |
| Feng Y et al.             | microRNA-99a acts as a tumor suppressor and is down-regulated in bladder cancer.                                                                                         | BMC Urol. 14:50                         | 2014 | <a href="#">24957100</a> |
| Fu Z et al.               | Circulating miR-222 in plasma and its potential diagnostic and prognostic value in gastric cancer.                                                                       | Med Oncol. 31(9):164.                   | 2014 | <a href="#">25129310</a> |
| Ganepola GA et al.        | Novel blood-based microRNA biomarker panel for early diagnosis of pancreatic cancer.                                                                                     | World J Gastrointest Oncol. 6(1):22-33. | 2014 | <a href="#">24578785</a> |
| Grassmann F et al.        | A Circulating MicroRNA Profile Is Associated with Late-Stage Neovascular Age-Related Macular Degeneration.                                                               | PLoS One. 9(9):e107461                  | 2014 | <a href="#">25203061</a> |
| Guo L et al.              | Differentially expressed plasma microRNAs and the potential regulatory function of Let-7b in chronic thromboembolic pulmonary hypertension.                              | PLoS One. 9(6):e101055                  | 2014 | <a href="#">24978044</a> |
| Hale A et al.             | An Argonaute 2 switch regulates circulating miR-210 to coordinate hypoxic adaptation across cells.                                                                       | Biochim Biophys Acta. 1843(11):2528-42. | 2014 | <a href="#">24983771</a> |
| Hromadnikova I et al.     | First trimester screening of circulating C19MC microRNAs can predict subsequent onset of gestational hypertension.                                                       | PLoS One. 9(12):e113735.                | 2014 | <a href="#">25502889</a> |
| Jiang R et al.            | Short-term diesel exhaust inhalation in a controlled human crossover study is associated with changes in DNA methylation of circulating mononuclear cells in asthmatics. | Part Fibre Toxicol. 11(1):71.           | 2014 | <a href="#">25487561</a> |
| Joerger et al.            | Circulating microRNA profiling in patients with advanced non-squamous NSCLC receiving bevacizumab/erlotinib followed by                                                  | Lung Cancer. 85(2):306-13.              | 2014 | <a href="#">24928469</a> |

|                        |                                                                                                                                                                                                |                                       |      |                          |
|------------------------|------------------------------------------------------------------------------------------------------------------------------------------------------------------------------------------------|---------------------------------------|------|--------------------------|
|                        | platinum-based chemotherapy at progression (SAKK 19/05).                                                                                                                                       |                                       |      |                          |
| Kim Y et al.           | Serum microRNA-21 as a potential biomarker for response to hypomethylating agents in myelodysplastic syndromes.                                                                                | PLoS One. 9(2):e86933.                | 2014 | <a href="#">24503739</a> |
| Kumarswamy R et al.    | Circulating long noncoding RNA, LIPCAR, predicts survival in patients with heart failure.                                                                                                      | Circ Res. 114(10):1569-75.            | 2014 | <a href="#">24663402</a> |
| Li D et al.            | Characterization of Circulating MicroRNA Expression in Patients with a Ventricular Septal Defect.                                                                                              | PLoS One. 9(8):e106318                | 2014 | <a href="#">25165856</a> |
| Li Q et al.            | Circulating miR-19a and miR-205 in Serum May Predict the Sensitivity of Luminal A Subtype of Breast Cancer Patients to Neoadjuvant Chemotherapy with Epirubicin Plus Paclitaxel.               | PLoS One. 9(8):e104870                | 2014 | <a href="#">25137071</a> |
| Li S et al.            | MicroRNA-19b functions as potential anti-thrombotic protector in patients with unstable angina by targeting tissue factor.                                                                     | J Mol Cell Cardiol. 75:49-57.         | 2014 | <a href="#">24998411</a> |
| Li Z et al.            | High Association between Human Circulating MicroRNA-497 and Acute Myocardial Infarction.                                                                                                       | ScientificWorldJournal. 2014:931845.  | 2014 | <a href="#">25110754</a> |
| Liu Y et al.           | The role of circulating microRNA-126 (miR-126): a novel biomarker for screening prediabetes and newly diagnosed type 2 diabetes mellitus.                                                      | Int J Mol Sci. 15(6):10567-77         | 2014 | <a href="#">24927146</a> |
| McManus DD et al.      | Relations between circulating microRNAs and atrial fibrillation: data from the Framingham Offspring Study.                                                                                     | Heart Rhythm. 11(4):663-9.            | 2014 | <a href="#">24444445</a> |
| Muller V et al.        | Changes in serum levels of miR-21, miR-210, and miR-373 in HER2-positive breast cancer patients undergoing neoadjuvant therapy: a translational research project within the Geparquinto trial. | Breast Cancer Res Treat. 147(1):61-8. | 2014 | <a href="#">25086636</a> |
| Mundalil Vasu M et al. | Serum microRNA profiles in children with autism.                                                                                                                                               | Mol Autism. 5:40                      | 2014 | <a href="#">25126405</a> |
| Park IH et al.         | Identification and clinical implications of circulating microRNAs for estrogen receptor-positive breast cancer.                                                                                | Tumour Biol. 35(12):12173-80.         | 2014 | <a href="#">25179838</a> |
| Pilbrow AP et al.      | Circulating miR-323-3p and miR-652: candidate markers for the presence and progression of acute coronary syndromes.                                                                            | Int J Cardiol. 176(2):375-85.         | 2014 | <a href="#">25124998</a> |
| Ren W et al.           | Circulating microRNA-21 (MIR-21) and phosphatase and tensin homolog (PTEN) are promising novel biomarkers for detection of oral squamous cell carcinoma.                                       | Biomarkers. 19(7):590-6.              | 2014 | <a href="#">25174622</a> |
| Rosjo H et al.         | Prognostic value of circulating microRNA-210 levels in patients                                                                                                                                | PLoS One. 9(3):e91812.                | 2014 | <a href="#">24626394</a> |



|                        |                                                                                                                                                    |                                              |      |                          |
|------------------------|----------------------------------------------------------------------------------------------------------------------------------------------------|----------------------------------------------|------|--------------------------|
|                        | with moderate to severe aortic stenosis.                                                                                                           |                                              |      |                          |
| Santovito T et al.     | Plasma Exosome MicroRNA Profiling Unravels a New Potential Modulator of Adiponectin Pathway in Diabetes: Effect of Glycemic Control                | J Clin Endocrinol Metab. 99(9):E1681-5.      | 2014 | <a href="#">24937531</a> |
| Seeliger C et al.      | Five freely circulating miRNAs and bone tissue miRNAs are associated with osteoporotic fractures.                                                  | J Bone Miner Res. 29(8):1718-28.             | 2014 | <a href="#">24431276</a> |
| Selvamani A et al.     | Circulating miRNA profiles provide a biomarker for severity of stroke outcomes associated with age and sex in a rat model.                         | Clin Sci (Lond). 127(2):77-89.               | 2014 | <a href="#">24428837</a> |
| Sepramaniam S et al.   | Circulating microRNAs as biomarkers of acute stroke.                                                                                               | Int J Mol Sci. 15(1):1418-32.                | 2014 | <a href="#">24447930</a> |
| Shen J et al.          | Circulating miR-148b and miR-133a as biomarkers for breast cancer detection.                                                                       | Oncotarget. 5(14):5284-94.                   | 2014 | <a href="#">25051376</a> |
| Silakit R et al.       | Circulating miR-192 in liver fluke-associated cholangiocarcinoma patients: a prospective prognostic indicator.                                     | J Hepatobiliary Pancreat Sci. 21(12):864-72. | 2014 | <a href="#">25131257</a> |
| Slater EP et al.       | MicroRNA-196a and -196b as Potential Biomarkers for the Early Detection of Familial Pancreatic Cancer.                                             | Transl Oncol. 7(4):464-71.                   | 2014 | <a href="#">24956938</a> |
| Tabet F et al.         | HDL-transferred microRNA-223 regulates ICAM-1 expression in endothelial cells.                                                                     | Nat Commun. 5:3292.                          | 2014 | <a href="#">24576947</a> |
| Takahashi K et al.     | Extracellular vesicle-mediated transfer of long non-coding RNA ROR modulates chemosensitivity in human hepatocellular cancer.                      | FEBS Open Bio. 4:458-67.                     | 2014 | <a href="#">24918061</a> |
| Tan J et al.           | MicroRNA-29 mediates TGF $\beta$ 1-induced extracellular matrix synthesis by targeting wnt/ $\beta$ -catenin pathway in human orbital fibroblasts. | Int J Clin Exp Pathol. 7(11):7571-7.         | 2014 | <a href="#">25550793</a> |
| Toivonen JM et al.     | MicroRNA-206: a potential circulating biomarker candidate for amyotrophic lateral sclerosis.                                                       | PLoS One. 9(2):e89065.                       | 2014 | <a href="#">24586506</a> |
| Ura B et al.           | Potential role of circulating microRNAs as early markers of preeclampsia.                                                                          | Taiwan J Obstet Gynecol. 53(2):232-4.        | 2014 | <a href="#">25017274</a> |
| Vliegenthart AD et al. | Retro-orbital blood acquisition facilitates circulating microRNA measurement in zebrafish with paracetamol hepatotoxicity.                         | Zebrafish. 11(3):219-26.                     | 2014 | <a href="#">24625211</a> |
| Wang HW et al.         | Deficiency of the microRNA-31-microRNA-720 pathway in the plasma and endothelial progenitor cells from patients with coronary artery disease.      | Arterioscler Thromb Vasc Biol. 34(4):857-69. | 2014 | <a href="#">24558106</a> |
| Wang JM et al.         | Dialysis method alters the expression of microRNA-33a and its                                                                                      | Ther Apher Dial. 18(1):44-50.                | 2014 | <a href="#">24499083</a> |

|                      |                                                                                                                                                        |                                             |      |                          |
|----------------------|--------------------------------------------------------------------------------------------------------------------------------------------------------|---------------------------------------------|------|--------------------------|
|                      | target genes ABCA1, ABCG1 in THP-1 macrophages.                                                                                                        |                                             |      |                          |
| Wang L et al.        | Polymorphism in miRNA-1 target site and circulating miRNA-1 phenotype are associated with the decreased risk and prognosis of coronary artery disease. | Int J Clin Exp Pathol. 7(8):5093-102        | 2014 | <a href="#">25197382</a> |
| Wang WT et al.       | Differentially expressed microRNAs in the serum of cervical squamous cell carcinoma patients before and after surgery.                                 | J Hematol Oncol. 7:6.                       | 2014 | <a href="#">24405714</a> |
| Wang X et al.        | Determination of 14 circulating microRNAs in Swedes and Iraqis with and without diabetes mellitus type 2.                                              | PLoS One. 9(1):e86792.                      | 2014 | <a href="#">24497980</a> |
| Ward J et al.        | Circulating microRNA profiles in human patients with acetaminophen hepatotoxicity or ischemic hepatitis.                                               | Proc Natl Acad Sci U S A. 111(33):12169-74. | 2014 | <a href="#">25092309</a> |
| Waters PS et al.     | Impact of tumour epithelial subtype on circulating microRNAs in breast cancer patients.                                                                | PLoS One. 9(3):e90605.                      | 2014 | <a href="#">24626163</a> |
| Westermann AM et al. | Serum microRNAs as biomarkers in patients undergoing prostate biopsy: results from a prospective multi-center study.                                   | Anticancer Res. 34(2):665-9.                | 2014 | <a href="#">24510997</a> |
| Winther TN et al.    | Circulating MicroRNAs in Plasma of Hepatitis B e Antigen Positive Children Reveal Liver-Specific Target Genes.                                         | Int J Hepatol. 2014:791045.                 | 2014 | <a href="#">25580300</a> |
| Wu JJ et al.         | 4-(Methylnitrosamino)-1-(3-pyridyl)-1-butanone induces circulating microRNA deregulation in early lung carcinogenesis.                                 | Biomed Environ Sci. 27(1):10-6.             | 2014 | <a href="#">24553369</a> |
| Xiang M et al.       | U6 is not a suitable endogenous control for the quantification of circulating microRNAs.                                                               | Biochem Biophys Res Commun. 454(1):210-4.   | 2014 | <a href="#">25450382</a> |
| Xiao J et al.        | Serum microRNA-499 and microRNA-208a as biomarkers of acute myocardial infarction.                                                                     | Int J Clin Exp Med. 7(1):136-41.            | 2014 | <a href="#">24482699</a> |
| Xie Y et al.         | Expression profiling of serum microRNA-101 in HBV-associated chronic hepatitis, liver cirrhosis, and hepatocellular carcinoma.                         | Cancer Biol Ther. 15(9):1248-55.            | 2014 | <a href="#">24971953</a> |
| Xin SY et al.        | Reduced expression of circulating microRNA-218 in gastric cancer and correlation with tumor invasion and prognosis.                                    | World J Gastroenterol. 20(22):6906-11       | 2014 | <a href="#">24944481</a> |
| Yang Q et al.        | MicroRNA-505 identified from patients with essential hypertension impairs endothelial cell migration and tube formation.                               | Int J Cardiol. 177(3):925-34.               | 2014 | <a href="#">25449503</a> |
| Yao Y et al.         | Plasma Levels of MicroRNA-499 Provide an Early Indication of Perioperative Myocardial Infarction in Coronary Artery Bypass Graft Patients.             | PLoS One. 9(8):e104618                      | 2014 | <a href="#">25111390</a> |

|                       |                                                                                                                                             |                                         |      |                          |
|-----------------------|---------------------------------------------------------------------------------------------------------------------------------------------|-----------------------------------------|------|--------------------------|
| Yu G et al.           | MicroRNA-34a functions as an anti-metastatic microRNA and suppresses angiogenesis in bladder cancer by directly targeting CD44.             | J Exp Clin Cancer Res. 33(1):779.       | 2014 | <a href="#">25551284</a> |
| Zhang J et al.        | Inflammation induced-endothelial cells release angiogenesis associated-microRNAs into circulation by microparticles.                        | Chin Med J (Engl). 127(12):2212-7.      | 2014 | <a href="#">24931230</a> |
| Zhang X et al.        | Expression profiles of six circulating microRNAs critical to atherosclerosis in patients with subclinical hypothyroidism: a clinical study. | J Clin Endocrinol Metab. 99(5):E766-74. | 2014 | <a href="#">24517143</a> |
| Zhang ZQ et al.       | Serum microRNA 143 and microRNA 215 as potential biomarkers for the diagnosis of chronic hepatitis and hepatocellular carcinoma.            | Diagn Pathol. 9:135.                    | 2014 | <a href="#">24993656</a> |
| Zhao Z et al.         | Dysregulated miR1254 and miR579 for cardiotoxicity in patients treated with bevacizumab in colorectal cancer.                               | Tumour Biol. 35(6):5227-35.             | 2014 | <a href="#">24515657</a> |
| Zhu C et al.          | A five-microRNA panel in plasma was identified as potential biomarker for early detection of gastric cancer.                                | Br J Cancer. 110(9):2291-9.             | 2014 | <a href="#">24595006</a> |
| Arita T et al.        | Circulating long non-coding RNAs in plasma of patients with gastric cancer.                                                                 | Anticancer Res. 33(8):3185-93.          | 2013 | <a href="#">23898077</a> |
| Aushev VN et al.      | Comparisons of microRNA Patterns in Plasma before and after Tumor Removal Reveal New Biomarkers of Lung Squamous Cell Carcinoma.            | PLoS One. 8(10):e78649.                 | 2013 | <a href="#">24130905</a> |
| Belleannee C et al.   | Epididymosomes convey different repertoires of microRNAs throughout the bovine epididymis.                                                  | Biol Reprod. 89(2):30                   | 2013 | <a href="#">23803555</a> |
| Belleannee C et al.   | microRNA signature is altered in both human epididymis and seminal microvesicles following vasectomy.                                       | Hum Reprod. 28(6):1455-67               | 2013 | <a href="#">23539611</a> |
| Chen L et al.         | Epigenetic regulation of connective tissue growth factor by microRNA-214 delivery in exosomes from mouse or human hepatic stellate cells.   | Hepatology.                             | 2013 | <a href="#">24122827</a> |
| Cuk K et al.          | Circulating microRNAs in plasma as early detection markers for breast cancer.                                                               | Int J Cancer. 132(7):1602-12.           | 2013 | <a href="#">22927033</a> |
| Cuk K et al.          | Plasma MicroRNA Panel for Minimally Invasive Detection of Breast Cancer.                                                                    | PLoS One. 8(10):e76729.                 | 2013 | <a href="#">24194846</a> |
| D'Alessandra Y et al. | Diagnostic potential of plasmatic MicroRNA signatures in stable and unstable angina.                                                        | PLoS One. 8(11):e80345.                 | 2013 | <a href="#">24260372</a> |
| de Boer HC et al.     | Aspirin treatment hampers the use of plasma microRNA-126 as a biomarker for the progression of vascular disease.                            | Eur Heart J.                            | 2013 | <a href="#">23386708</a> |

|                       |                                                                                                                                                      |                                                    |      |                          |
|-----------------------|------------------------------------------------------------------------------------------------------------------------------------------------------|----------------------------------------------------|------|--------------------------|
| Fan F et al.          | MicroRNA-34a Promotes Cardiomyocyte Apoptosis Post Myocardial Infarction Through Down-regulating Aldehyde Dehydrogenase 2.                           | Curr Pharm Des.                                    | 2013 | <a href="#">23323620</a> |
| Fu Y et al.           | Circulating microRNA-101 as a potential biomarker for hepatitis B virus-related hepatocellular carcinoma.                                            | Oncol Lett. 6(6):1811-1815.                        | 2013 | <a href="#">24260081</a> |
| Gao J et al.          | Clinical significance of serum miR-21 in breast cancer compared with CA153 and CEA.                                                                  | Chin J Cancer Res. 25(6):743-8.                    | 2013 | <a href="#">24385703</a> |
| Ge Y et al.           | Serum microRNA expression profile as a biomarker for the diagnosis of pertussis.                                                                     | Mol Biol Rep. 40(2):1325-32                        | 2013 | <a href="#">23073777</a> |
| He X et al.           | Host serum miR-223 is a potential new biomarker for Schistosoma japonicum infection and the response to chemotherapy.                                | Parasit Vectors. 6:272.                            | 2013 | <a href="#">24330517</a> |
| Hooten NN et al.      | Age-related changes in microRNA levels in serum.                                                                                                     | Aging (Albany NY).                                 | 2013 | <a href="#">24088671</a> |
| Hromadnikova I et al. | Circulating C19MC microRNAs in preeclampsia, gestational hypertension, and fetal growth restriction.                                                 | Mediators Inflamm. 2013:186041.                    | 2013 | <a href="#">24347821</a> |
| Ikonomidis JS et al.  | Plasma biomarkers for distinguishing etiologic subtypes of thoracic aortic aneurysm disease.                                                         | J Thorac Cardiovasc Surg. pii: S0022-5223(12)01571 | 2013 | <a href="#">23312977</a> |
| Jones KL et al.       | Plasma microRNA are disease response biomarkers in classical Hodgkin lymphoma.                                                                       | Clin Cancer Res.                                   | 2013 | <a href="#">24222179</a> |
| Kogure T et al.       | Extracellular Vesicle-Mediated Transfer of a Novel Long Noncoding RNA TUC339: A Mechanism of Intercellular Signaling in Human Hepatocellular Cancer. | Genes Cancer. 4(7-8):261-72.                       | 2013 | <a href="#">24167654</a> |
| Kotlabova K et al.    | Extracellular chromosome 21-derived microRNAs in euploid & aneuploid pregnancies.                                                                    | Indian J Med Res. 138(6):935-43.                   | 2013 | <a href="#">24521639</a> |
| Lee JC et al.         | MicroRNA-222 and microRNA-146b are tissue and circulating biomarkers of recurrent papillary thyroid cancer.                                          | Cancer. 119(24):4358-65.                           | 2013 | <a href="#">24301304</a> |
| Ma GJ et al.          | Plasma post-operative miR-21 expression in the prognosis of gastric cancers.                                                                         | Asian Pac J Cancer Prev. 14(12):7551-4.            | 2013 | <a href="#">24460332</a> |
| Muraoka T et al.      | The degree of microRNA-34b/c methylation in serum-circulating DNA is associated with malignant pleural mesothelioma.                                 | Lung Cancer. 82(3):485-90.                         | 2013 | <a href="#">24168922</a> |
| Nabiałek E et al.     | Circulating microRNAs (miR-423-5p, miR-208a and miR-1) in acute myocardial infarction and stable coronary heart disease.                             | Minerva Cardioangiol. 61(6):627-37.                | 2013 | <a href="#">24253456</a> |
| Pescador N et al.     | Serum Circulating microRNA Profiling for Identification of                                                                                           | PLoS One. 8(10):e77251.                            | 2013 | <a href="#">24204780</a> |

|                        |                                                                                                                                                                        |                                          |      |                          |
|------------------------|------------------------------------------------------------------------------------------------------------------------------------------------------------------------|------------------------------------------|------|--------------------------|
|                        | Potential Type 2 Diabetes and Obesity Biomarkers.                                                                                                                      |                                          |      |                          |
| Ren S et al.           | Long non-coding RNA metastasis associated in lung adenocarcinoma transcript 1 derived miniRNA as a novel plasma-based biomarker for diagnosing prostate cancer.        | Eur J Cancer. 49(13):2949-59.            | 2013 | <a href="#">23726266</a> |
| Roderburg C et al.     | Circulating MicroRNA-150 Serum Levels Predict Survival in Patients with Critical Illness and Sepsis.                                                                   | PLoS One. 8(1):e54612.                   | 2013 | <a href="#">23372743</a> |
| Sheinerman KS et al.   | Plasma microRNA biomarkers for detection of mild cognitive impairment: biomarker validation study.                                                                     | Aging (Albany NY). 5(12):925-38.         | 2013 | <a href="#">24368295</a> |
| Shen J et al.          | Exploration of Genome-wide Circulating MicroRNA in Hepatocellular Carcinoma (HCC): MiR-483-5p as a Potential Biomarker.                                                | Cancer Epidemiol Biomarkers Prev.        | 2013 | <a href="#">24127413</a> |
| Shrivastava S et al.   | Upregulation of circulating miR-20a is correlated with hepatitis C virus mediated liver disease progression.                                                           | Hepatology                               | 2013 | <a href="#">23390075</a> |
| Song J et al.          | Serum microRNA-21 levels are related to tumor size in gastric cancer patients but cannot predict prognosis.                                                            | Oncol Lett. 6(6):1733-1737.              | 2013 | <a href="#">24260069</a> |
| Song WF et al.         | MiR-21 upregulation induced by promoter zone histone acetylation is associated with chemoresistance to gemcitabine and enhanced malignancy of pancreatic cancer cells. | Asian Pac J Cancer Prev. 14(12):7529-36. | 2013 | <a href="#">24460329</a> |
| Sun L et al.           | MicroRNA expression profiles of circulating microvesicles in hepatocellular carcinoma.                                                                                 | Acta Gastroenterol Belg. 76(4):386-92.   | 2013 | <a href="#">24592541</a> |
| Tambyah PA et al.      | microRNAs in circulation are altered in response to influenza A virus infection in humans.                                                                             | PLoS One. 8(10):e76811.                  | 2013 | <a href="#">24116168</a> |
| van der Meer AJ et al. | Sensitive detection of hepatocellular injury in chronic hepatitis C patients with circulating hepatocyte-derived microRNA-122.                                         | J Viral Hepat. 20(3):158-66.             | 2013 | <a href="#">23383654</a> |
| Wang WT et al.         | Circulating MicroRNAs Identified in a Genome-Wide Serum MicroRNA Expression Analysis as Noninvasive Biomarkers for Endometriosis.                                      | J Clin Endocrinol Metab. 98(1):281-9     | 2013 | <a href="#">23118427</a> |
| Wang YT et al.         | Circulating microRNAs have a sex-specific association with metabolic syndrome.                                                                                         | J Biomed Sci. 20(1):72.                  | 2013 | <a href="#">24093444</a> |
| Ward JA et al.         | Circulating Cell and Plasma microRNA Profiles Differ between Non-ST-Segment and ST-Segment-Elevation Myocardial Infarction.                                            | Fam Med Med Sci Res. 2(2):108.           | 2013 | <a href="#">24432306</a> |
| Watahiki A et al.      | Plasma miRNAs as Biomarkers to Identify Patients with Castration-Resistant Metastatic Prostate Cancer.                                                                 | Int J Mol Sci. 14(4):7757-70.            | 2013 | <a href="#">23574937</a> |

|                       |                                                                                                                                                                      |                                                    |      |                          |
|-----------------------|----------------------------------------------------------------------------------------------------------------------------------------------------------------------|----------------------------------------------------|------|--------------------------|
| Yan S et al.          | Circulating MicroRNA Profiles Altered in Mice after 28 Days Exposure to Perfluorooctanoic Acid.                                                                      | Toxicol Lett. pii: S0378-4274(13)01360-X.          | 2013 | <a href="#">24513432</a> |
| Zhang H et al.        | Circulating microRNAs in relation to EGFR status and survival of lung adenocarcinoma in female non-smokers.                                                          | PLoS One. 8(11):e81408.                            | 2013 | <a href="#">24282590</a> |
| Zhang T et al.        | Plasma miR-126 is a potential biomarker for early prediction of type 2 diabetes mellitus in susceptible individuals.                                                 | Biomed Res Int. 2013:761617.                       | 2013 | <a href="#">24455723</a> |
| Zhang YY et al.       | Decreased circulating microRNA-223 level predicts high on-treatment platelet reactivity in patients with troponin-negative non-ST elevation acute coronary syndrome. | J Thromb Thrombolysis.                             | 2013 | <a href="#">24202700</a> |
| Alexandrov PN et al.  | microRNA (miRNA) speciation in Alzheimer's disease (AD) cerebrospinal fluid (CSF) and extracellular fluid (ECF).                                                     | Int J Biochem Mol Biol. 3(4):365-73.               | 2012 | <a href="#">23301201</a> |
| Bellingham SA et al.  | Small RNA deep sequencing reveals a distinct miRNA signature released in exosomes from prion-infected neuronal cells.                                                | Nucleic Acids Res. 40(21):10937-49                 | 2012 | <a href="#">22965126</a> |
| bryant rj et al.      | changes in circulating microrna levels associated with prostate cancer.                                                                                              | br j cancer. 106(4):768-74.                        | 2012 | <a href="#">22240788</a> |
| chen zh et al.        | a panel of five circulating micrnas as potential biomarkers for prostate cancer.                                                                                     | prostate. doi: 10.1002/pros.22495.                 | 2012 | <a href="#">22298030</a> |
| Cookson VJ et al.     | Circulating microRNA profiles reflect the presence of breast tumours but not the profiles of microRNAs within the tumours.                                           | Cell Oncol (Dordr).                                | 2012 | <a href="#">22821209</a> |
| da Silveira JC et al. | Cell-secreted vesicles in equine ovarian follicular fluid contain miRNAs and proteins: a possible new form of cell communication within the ovarian follicle.        | Biol Reprod. 86(3):71                              | 2012 | <a href="#">22116803</a> |
| ding x et al.         | circulating microrna-122 as a potential biomarker for liver injury.                                                                                                  | mol med report. 5(6):1428-32.                      | 2012 | <a href="#">22427142</a> |
| Freedman JE et al.    | The distribution of circulating microRNA and their relation to coronary disease.                                                                                     | F1000Res. 1:50.                                    | 2012 | <a href="#">24358814</a> |
| Gallo A et al.        | The Majority of MicroRNAs Detectable in Serum and Saliva Is Concentrated in Exosomes.                                                                                | PLoS One. 7(3):e30679.                             | 2012 | <a href="#">22427800</a> |
| Giráldez MD et al.    | Circulating MicroRNAs as Biomarkers of Colorectal Cancer: Results From a Genome-Wide Profiling and Validation Study.                                                 | Clin Gastroenterol Hepatol. pii: S1542-3565(12)015 | 2012 | <a href="#">23267864</a> |
| goren y et al.        | serum levels of micrnas in patients with heart failure.                                                                                                              | eur j heart fail. 14(2):147-54                     | 2012 | <a href="#">22120965</a> |
| Gorur A et al.        | Determination of plasma microRNA for early detection of gastric cancer.                                                                                              | Mol Biol Rep.                                      | 2012 | <a href="#">23212612</a> |

|                      |                                                                                                                                                                                                                          |                                 |      |                          |
|----------------------|--------------------------------------------------------------------------------------------------------------------------------------------------------------------------------------------------------------------------|---------------------------------|------|--------------------------|
| hennessey pt et al.  | serum microrna biomarkers for detection of non-small cell lung cancer                                                                                                                                                    | plos one 7(2): e32307.          | 2012 | <a href="#">22389695</a> |
| huang jj et al.      | circulating microrna expression is associated with genetic subtype and survival of multiple myeloma.                                                                                                                     | med oncol.                      | 2012 | <a href="#">22447484</a> |
| Ilhan-Mutlu A et al. | Plasma MicroRNA-21 Concentration May Be a Useful Biomarker in Glioblastoma Patients.                                                                                                                                     | Cancer Invest. 30(8):615-21     | 2012 | <a href="#">22891879</a> |
| Jia SZ et al.        | Plasma miR-17-5p, miR-20a and miR-22 are down-regulated in women with endometriosis.                                                                                                                                     | Hum Reprod.                     | 2012 | <a href="#">23203215</a> |
| Jones CI et al.      | Identification of circulating microRNAs as diagnostic biomarkers for use in multiple myeloma.                                                                                                                            | Br J Cancer.                    | 2012 | <a href="#">23169280</a> |
| Kan CW et al.        | Elevated levels of circulating microRNA-200 family members correlate with serous epithelial ovarian cancer.                                                                                                              | BMC Cancer. 12(1):627           | 2012 | <a href="#">23272653</a> |
| liu h et al.         | genome-wide microrna profiles identify mir-378 as a serum biomarker for early detection of gastric cancer.                                                                                                               | cancer lett. 316(2):196-203.    | 2012 | <a href="#">22169097</a> |
| Long G et al.        | Human Circulating MicroRNA-1 and MicroRNA-126 as Potential Novel Indicators for Acute Myocardial Infarction.                                                                                                             | Int J Biol Sci. 8(6):811-8.     | 2012 | <a href="#">22719221</a> |
| Madhavan D et al.    | Circulating microRNAs as Surrogate Markers for Circulating Tumour Cells and Prognostic Markers in Metastatic Breast Cancer.                                                                                              | Clin Cancer Res. 18(21):5972-82 | 2012 | <a href="#">22952344</a> |
| Martino F et al.     | Circulating MicroRNAs Are Not Eliminated by Hemodialysis.                                                                                                                                                                | PLoS One. 7(6): e38269.         | 2012 | <a href="#">22715378</a> |
| Nguyen HC et al.     | Expression differences of circulating microRNAs in metastatic castration resistant prostate cancer and low-risk, localized prostate cancer.                                                                              | Prostate.                       | 2012 | <a href="#">22887127</a> |
| Nielsen LB et al.    | Circulating levels of microRNA from children with newly diagnosed type 1 diabetes and healthy controls: evidence that miR-25 associates to residual beta-cell function and glycaemic control during disease progression. | Exp Diabetes Res. 2012:896362   | 2012 | <a href="#">22829805</a> |
| Roth C et al.        | Low Levels of Cell-Free Circulating miR-361-3p and miR-625* as Blood-Based Markers for Discriminating Malignant from Benign Lung Tumors.                                                                                 | PLoS One. 7(6):e38248.          | 2012 | <a href="#">22675530</a> |
| Sanders I et al.     | Evaluation of reference genes for the analysis of serum miRNA in patients with prostate cancer, bladder cancer and renal cell carcinoma.                                                                                 | Int J Urol. 19(11):1017-25.     | 2012 | <a href="#">22788411</a> |
| Scheffer AR et al.   | Circulating microRNAs in serum: novel biomarkers for patients with bladder cancer?                                                                                                                                       | World J Urol.                   | 2012 | <a href="#">23266581</a> |

|                          |                                                                                                                                                                                                  |                                          |      |                          |
|--------------------------|--------------------------------------------------------------------------------------------------------------------------------------------------------------------------------------------------|------------------------------------------|------|--------------------------|
| schwarzenbach h et al.   | diagnostic potential of pten-targeting mir-214 in the blood of breast cancer patients.                                                                                                           | breast cancer res treat.                 | 2012 | <a href="#">22350790</a> |
| Selth LA et al.          | Discovery of circulating microRNAs associated with human prostate cancer using a mouse model of disease.                                                                                         | Int J Cancer. 131(3):652-61.             | 2012 | <a href="#">22052531</a> |
| Shen J et al.            | Dysregulation of circulating microRNAs and prediction of aggressive prostate cancer.                                                                                                             | Prostate. 72(13):1469-77.                | 2012 | <a href="#">22298119</a> |
| Si H et al.              | Circulating microRNA-92a and microRNA-21 as novel minimally invasive biomarkers for primary breast cancer.                                                                                       | J Cancer Res Clin Oncol.                 | 2012 | <a href="#">23052693</a> |
| Siegel SR et al.         | Circulating microRNAs involved in multiple sclerosis.                                                                                                                                            | Mol Biol Rep. 39(5):6219-25.             | 2012 | <a href="#">22231906</a> |
| song j et al.            | identification of suitable reference genes for qpcr analysis of serum microrna in gastric cancer patients.                                                                                       | dig dis sci. 57(4):897-904.              | 2012 | <a href="#">22198701</a> |
| Sun X et al.             | Circulating microRNA-126 in patients with coronary artery disease: correlation with LDL cholesterol.                                                                                             | Thromb J. 10(1):16                       | 2012 | <a href="#">22925274</a> |
| Sun Y et al.             | Serum MicroRNA-155 as a Potential Biomarker to Track Disease in Breast Cancer.                                                                                                                   | PLoS One. 7(10):e47003.                  | 2012 | <a href="#">23071695</a> |
| tomimaru y et al.        | circulating microrna-21 as a novel biomarker for hepatocellular carcinoma.                                                                                                                       | j hepatol. 56(1):167-75.                 | 2012 | <a href="#">21749846</a> |
| tsai kw et al.           | aberrant expression of mir-196a in gastric cancers and correlation with recurrence.                                                                                                              | genes chromosomes cancer. 51(4):394-401. | 2012 | <a href="#">22420029</a> |
| Uhlemann M et al.        | Circulating microRNA-126 increases after different forms of endurance exercise in healthy adults.                                                                                                | Eur J Prev Cardiol.                      | 2012 | <a href="#">23150891</a> |
| van schooneveld e et al. | expression profiling of cancerous and normal breast tissues identifies micromas that are differentially expressed in serum from patients with (metastatic) breast cancer and healthy volunteers. | breast cancer res. 14(1):r34.            | 2012 | <a href="#">22353773</a> |
| Villar AV et al.         | Myocardial and circulating levels of microRNA-21 reflect left ventricular fibrosis in aortic stenosis patients.                                                                                  | Int J Cardiol.                           | 2012 | <a href="#">22882958</a> |
| Wang B et al.            | The expression and clinical significance of circulating microRNA-21 in serum of five solid tumors.                                                                                               | J Cancer Res Clin Oncol.                 | 2012 | <a href="#">22638884</a> |
| wang lg et al.           | serum microrna-29a is a promising novel marker for early detection of colorectal liver metastasis.                                                                                               | cancer epidemiol. 36(1):e61-7.           | 2012 | <a href="#">22018950</a> |
| Wang Q et al.            | Plasma miR-601 and miR-760 Are Novel Biomarkers for the Early Detection of Colorectal Cancer.                                                                                                    | PLoS One. 7(9):e44398.                   | 2012 | <a href="#">22970209</a> |
| Wang T et al.            | Cell-Free MicroRNA Expression Profiles in Malignant Effusion                                                                                                                                     | PLoS One. 7(8):e43268                    | 2012 | <a href="#">22937028</a> |



|                   |                                                                                                                                                              |                                            |      |                          |
|-------------------|--------------------------------------------------------------------------------------------------------------------------------------------------------------|--------------------------------------------|------|--------------------------|
|                   | Associated with Patient Survival in Non-Small Cell Lung Cancer.                                                                                              |                                            |      |                          |
| Yang C et al.     | Identification of seven serum microRNAs from a genome-wide serum microRNA expression profile as potential noninvasive biomarkers for malignant astrocytomas. | Int J Cancer. doi:10.1002/ijc.27657.       | 2012 | <a href="#">22674182</a> |
| yu j et al.       | circulating microRNA-218 was reduced in cervical cancer and correlated with tumor invasion.                                                                  | j cancer res clin oncol. 138(4):671-4.     | 2012 | <a href="#">22237456</a> |
| yu s et al.       | circulating microRNA profiles as potential biomarkers for diagnosis of papillary thyroid carcinoma.                                                          | j clin endocrinol metab.                   | 2012 | <a href="#">22472564</a> |
| Zahm AM et al.    | Circulating MicroRNA is a Biomarker of Biliary Atresia.                                                                                                      | J Pediatr Gastroenterol Nutr.              | 2012 | <a href="#">22732895</a> |
| Zhao A et al.     | Serum miR-210 as a novel biomarker for molecular diagnosis of clear cell renal cell carcinoma.                                                               | Exp Mol Pathol. pii: S0014-4800(12)00152-9 | 2012 | <a href="#">23064048</a> |
| zhao z et al.     | circulating microRNA mir-323-3p as a biomarker of ectopic pregnancy.                                                                                         | clin chem.                                 | 2012 | <a href="#">22395025</a> |
| Zheng C et al.    | MiR-221 expression affects invasion potential of human prostate carcinoma cell lines by targeting DVL2.                                                      | Med Oncol. 29(2):815-22.                   | 2012 | <a href="#">21487968</a> |
| zhu ht et al.     | identification of suitable reference genes for qrt-pcr analysis of circulating microRNAs in hepatitis b virus-infected patients.                             | mol biotechnol. 50(1):49-56.               | 2012 | <a href="#">21567136</a> |
| arroyo jd et al.  | argonaute2 complexes carry a population of circulating microRNAs independent of vesicles in human plasma.                                                    | pnas 108(12):5003-8                        | 2011 | <a href="#">21383194</a> |
| asaga s et al.    | direct serum assay for microRNA-21 concentrations in early and advanced breast cancer                                                                        | clin chem. 57(1):84-91                     | 2011 | <a href="#">21036945</a> |
| baggish al et al. | dynamic regulation of circulating microRNA during acute exhaustive exercise and sustained aerobic exercise training.                                         | j physiol. 589(pt 16):3983-94.             | 2011 | <a href="#">21690193</a> |
| bihrer v et al.   | serum microRNA-21 as marker for necroinflammation in hepatitis c patients with and without hepatocellular carcinoma.                                         | plos one 6(10): e26971.                    | 2011 | <a href="#">22066022</a> |
| Brase JC et al.   | Circulating miRNAs are correlated with tumor progression in prostate cancer.                                                                                 | Int J Cancer. 128(3):608-16.               | 2011 | <a href="#">20473869</a> |
| cermelli s et al. | circulating microRNAs in patients with chronic hepatitis c and non-alcoholic fatty liver disease.                                                            | plos one.6(8):e23937                       | 2011 | <a href="#">21886843</a> |
| cheng h et al.    | circulating plasma mir-141 is a novel biomarker for metastatic colon cancer and predicts poor prognosis.                                                     | plos one.6(3):e17745.                      | 2011 | <a href="#">21445232</a> |
| cui l et al.      | serum microRNA expression profile distinguishes enterovirus 71 and coxsackievirus 16 infections in patients with hand-foot-and-mouth disease.                | plos one. 6(11):e27071.                    | 2011 | <a href="#">22087245</a> |

|                      |                                                                                                                                                                                                                               |                                     |      |                          |
|----------------------|-------------------------------------------------------------------------------------------------------------------------------------------------------------------------------------------------------------------------------|-------------------------------------|------|--------------------------|
| de rosa s et al.     | transcoronary concentration gradients of circulating micrnas.                                                                                                                                                                 | circulation. 124(18):1936-44.       | 2011 | <a href="#">21969012</a> |
| dutttagupta r et al. | impact of cellular mirnas on circulating mirna biomarker signatures                                                                                                                                                           | plos one 6(6): e20769.              | 2011 | <a href="#">21698099</a> |
| ge q et al.          | sequencing circulating mirna in maternal plasma with modified library preparation.                                                                                                                                            | clin chim acta. 412(21-22):1989-94. | 2011 | <a href="#">21806976</a> |
| gidlof o et al.      | cardiospecific microrna plasma levels correlate with troponin and cardiac function in patients with st elevation myocardial infarction, are selectively dependent on renal elimination, and can be detected in urine samples. | cardiology. 118(4):217-26.          | 2011 | <a href="#">21701171</a> |
| gonzales jc et al.   | comparison of circulating microrna 141 to circulating tumor cells, lactate dehydrogenase, and prostate-specific antigen for determining treatment response in patients with metastatic prostate cancer.                       | clin genitourin cancer. 9(1):39-45. | 2011 | <a href="#">21723797</a> |
| gui j et al.         | serum microrna characterization identifies mir-885-5p as a potential marker for detecting liver pathologies.                                                                                                                  | clin sci (lond). 120(5):183-93.     | 2011 | <a href="#">20815808</a> |
| gunel t et al.       | serum microrna expression in pregnancies with preeclampsia.                                                                                                                                                                   | genet mol res. 10(4).               | 2011 | <a href="#">22095477</a> |
| jung ej et al.       | plasma microrna 210 levels correlate with sensitivity to trastuzumab and tumor presence in breast cancer patients.                                                                                                            | cancer.                             | 2011 | <a href="#">22370716</a> |
| kanemaru h et al     | the circulating microrna-221 level in patients with malignant melanoma as a new tumor marker.                                                                                                                                 | j dermatol sci. 61(3):187-93.       | 2011 | <a href="#">21273047</a> |
| li s et al.          | signature microrna expression profile of essential hypertension and its novel link to human cytomegalovirus infection.                                                                                                        | circulation. 124(2):175-84.         | 2011 | <a href="#">21690488</a> |
| Mahn R et al.        | Circulating microRNAs (miRNA) in serum of patients with prostate cancer.                                                                                                                                                      | Urology. 77(5):1265.e9-16.          | 2011 | <a href="#">21539977</a> |
| mcdonald js et al.   | analysis of circulating microrna: preanalytical and analytical challenges.                                                                                                                                                    | clin chem. 57(6):833-40             | 2011 | <a href="#">21487102</a> |
| mittelbrunn m et al. | unidirectional transfer of microrna-loaded exosomes from t cells to antigen-presenting cells.                                                                                                                                 | nat commun.2:282.                   | 2011 | <a href="#">21505438</a> |
| Moltzahn F et al.    | Microfluidic-based multiplex qRT-PCR identifies diagnostic and prognostic microRNA signatures in the sera of prostate cancer patients.                                                                                        | Cancer Res. 71(2):550-60.           | 2011 | <a href="#">21098088</a> |
| moussay e et al.     | microrna as biomarkers and regulators in b-cell chronic lymphocytic leukemia.                                                                                                                                                 | pnas 108(16):6573-8                 | 2011 | <a href="#">21460253</a> |
| oyama r et al.       | circulating microrna associated with tnf-a signaling pathway in patients with plaque psoriasis.                                                                                                                               | j dermatol sci. 61(3):209-11.       | 2011 | <a href="#">21277746</a> |

|                         |                                                                                                                                                      |                                        |      |                          |
|-------------------------|------------------------------------------------------------------------------------------------------------------------------------------------------|----------------------------------------|------|--------------------------|
| rong h et al.           | microrna-134 plasma levels before and after treatment for bipolar mania.                                                                             | j psychiatr res. 45(1):92-5.           | 2011 | <a href="#">20546789</a> |
| roth c et al.           | screening for circulating nucleic acids and caspase activity in the peripheral blood as potential diagnostic tools in lung cancer.                   | mol oncol. 5(3):281-91.                | 2011 | <a href="#">21398193</a> |
| rupp ak et al.          | loss of epcam expression in breast cancer derived serum exosomes: role of proteolytic cleavage.                                                      | gynecol oncol. 122(2):437-46.          | 2011 | <a href="#">21601258</a> |
| shen j et al.           | diagnosis of lung cancer in individuals with solitary pulmonary nodules by plasma microrna biomarkers                                                | bmc cancer. 11:374.                    | 2011 | <a href="#">21864403</a> |
| silva j et al.          | vesicle-related micrnas in plasma of nonsmall cell lung cancer patients and correlation with survival.                                               | eur respir j. 37(3):617-23.            | 2011 | <a href="#">20595154</a> |
| Starkey Lewis PJ et al. | Circulating microRNAs as potential markers of human drug-induced liver injury.                                                                       | Hepatology. 54(5):1767-76.             | 2011 | <a href="#">22045675</a> |
| turchinovich a et al.   | characterization of extracellular circulating microrna.                                                                                              | nucleic acids res. 39 (16): 7223-7233. | 2011 | <a href="#">21609964</a> |
| tutarel o et al.        | circulating mir-423_5p fails as a biomarker for systemic ventricular function in adults after atrial repair for transposition of the great arteries. | int j cardiol.                         | 2011 | <a href="#">22188991</a> |
| vickers kc et al.       | micrnas are transported in plasma and delivered to recipient cells by high-density lipoproteins                                                      | nat cell biol. 13(4):423-33.           | 2011 | <a href="#">21423178</a> |
| wang g et al.           | serum and urinary free microrna level in patients with systemic lupus erythematosus.                                                                 | lupus. 20(5):493-500.                  | 2011 | <a href="#">21372198</a> |
| wang y et al.           | nanopore-based detection of circulating micrnas in lung cancer patients.                                                                             | nat nanotechnol. 6(10):668-74.         | 2011 | <a href="#">21892163</a> |
| wei j et al.            | identification of plasma microrna-21 as a biomarker for early detection and chemosensitivity of non-small cell lung cancer.                          | chin j cancer. 30(6):407-14.           | 2011 | <a href="#">21627863</a> |
| wulfken lm et al.       | micrnas in renal cell carcinoma: diagnostic implications of serum mir-1233 levels.                                                                   | plos one. 6(9):e25787.                 | 2011 | <a href="#">21984948</a> |
| xiao j et al.           | microrna-134 as a potential plasma biomarker for the diagnosis of acute pulmonary embolism.                                                          | j transl med. 9:159.                   | 2011 | <a href="#">21943159</a> |
| xu j et al.             | circulating micrnas, mir-21, mir-122, and mir-223, in patients with hepatocellular carcinoma or chronic hepatitis.                                   | mol carcinog. 50(2):136-42.            | 2011 | <a href="#">21229610</a> |
| Yaman Agaoglu F et al.  | Investigation of miR-21, miR-141, and miR-221 in blood circulation of patients with prostate cancer.                                                 | Tumour Biol. 32(3):583-8.              | 2011 | <a href="#">21274675</a> |
| Yang M et al.           | Microvesicles secreted by macrophages shuttle invasion-potentiating microRNAs into breast cancer cells.                                              | Mol Cancer. 10:117                     | 2011 | <a href="#">21939504</a> |

|                       |                                                                                                                                                                                  |                                            |      |                          |
|-----------------------|----------------------------------------------------------------------------------------------------------------------------------------------------------------------------------|--------------------------------------------|------|--------------------------|
| yang q et al.         | application of next-generation sequencing technology to profile the circulating micrnas in the serum of preeclampsia versus normal pregnant women.                               | clin chim acta. 412(23-24):2167-73.        | 2011 | <a href="#">21840305</a> |
| zahn am et al.        | circulating microrna is a biomarker of pediatric crohn disease.                                                                                                                  | j pediatr gastroenterol nutr. 53(1):26-33. | 2011 | <a href="#">21546856</a> |
| Zhang HL et al.       | Serum miRNA-21: elevated levels in patients with metastatic hormone-refractory prostate cancer and potential predictive factor for the efficacy of docetaxel-based chemotherapy. | Prostate. 71(3):326-31.                    | 2011 | <a href="#">20842666</a> |
| ai j et al.           | circulating microrna-1 as a potential novel biomarker for acute myocardial infarction.                                                                                           | biochem biophys res commun.391(1):73-7.    | 2010 | <a href="#">19896465</a> |
| cheng y et al.        | a translational study of circulating cell-free microrna-1 in acute myocardial infarction.                                                                                        | clin sci (lond). 119(2):87-95.             | 2010 | <a href="#">20218970</a> |
| Collino F et al.      | Microvesicles derived from adult human bone marrow and tissue specific mesenchymal stem cells shuttle selected pattern of miRNAs.                                                | PLoS One. 5(7):e11803                      | 2010 | <a href="#">20668554</a> |
| corsten mf et al.     | circulating microrna-208b and microrna-499 reflect myocardial damage in cardiovascular disease.                                                                                  | circ cardiovasc genet. 3(6):499-506.       | 2010 | <a href="#">20921333</a> |
| fichtlscherer s et al | circulating micrnas in patients with coronary artery disease.                                                                                                                    | circ res. 107(5):677-84.                   | 2010 | <a href="#">20595655</a> |
| guo hq et al.         | diagnostic and prognostic value of circulating mir-221 for extranodal natural killer/t-cell lymphoma.                                                                            | dis markers. 29(5):251-8.                  | 2010 | <a href="#">21206010</a> |
| hanke m et al.        | a robust methodology to study urine microrna as tumor marker: microrna-126 and microrna-182 are related to urinary bladder cancer.                                               | urol oncol. 28(6):655-61.                  | 2010 | <a href="#">19375957</a> |
| ho as et al.          | circulating mir-210 as a novel hypoxia marker in pancreatic cancer.                                                                                                              | transl oncol. 3(2):109-13.                 | 2010 | <a href="#">20360935</a> |
| huang z et al.        | plasma micrnas are promising novel biomarkers for early detection of colorectal cancer.                                                                                          | int j cancer. 127(1):118-26.               | 2010 | <a href="#">19876917</a> |
| li a et al.           | pancreatic cancers epigenetically silence sip1 and hypomethylate and overexpress mir-200a/200b in association with elevated circulating mir-200a and mir-200b levels.            | cancer res. 70(13):5226-37                 | 2010 | <a href="#">20551052</a> |
| Michael A et al.      | Exosomes from human saliva as a source of microRNA biomarkers.                                                                                                                   | Oral Dis. 16(1):34-8                       | 2010 | <a href="#">19627513</a> |
| miyachi m et al.      | circulating muscle-specific microrna, mir-206, as a potential diagnostic marker for rhabdomyosarcoma.                                                                            | biochem biophys res commun. 400(1):89-93   | 2010 | <a href="#">20696132</a> |
| Ogawa R et al.        | Adipocyte-derived microvesicles contain RNA that is transported into macrophages and might be secreted into blood circulation.                                                   | Biochem Biophys Res Commun. 398(4):723-    | 2010 | <a href="#">20621060</a> |
| ohshima k et al.      | let-7 microrna family is selectively secreted into the extracellular                                                                                                             | plos one.5(10):e13247.                     | 2010 | <a href="#">20949044</a> |

|                     |                                                                                                                 |                                           |      |                          |
|---------------------|-----------------------------------------------------------------------------------------------------------------|-------------------------------------------|------|--------------------------|
|                     | environment via exosomes in a metastatic gastric cancer cell line.                                              |                                           |      |                          |
| Pegtel DM et al.    | Functional delivery of viral miRNAs via exosomes.                                                               | Proc Natl Acad Sci U S A. 107(14):6328-33 | 2010 | <a href="#">20304794</a> |
| pigati l et al.     | selective release of microrna species from normal and malignant mammary epithelial cells.                       | plos one. 5(10):e13515.                   | 2010 | <a href="#">20976003</a> |
| redell jb et al.    | human traumatic brain injury alters plasma microrna levels.                                                     | j neurotrauma. 27(12):2147-56.            | 2010 | <a href="#">20883153</a> |
| roth c et al.       | circulating micrnas as blood-based markers for patients with primary and metastatic breast cancer.              | breast cancer res. 12(6):r90.             | 2010 | <a href="#">21047409</a> |
| tsujiura m et al.   | circulating micrnas in plasma of patients with gastric cancers.                                                 | br j cancer. 102(7):1174-9                | 2010 | <a href="#">20234369</a> |
| wang gk et al.      | circulating microrna: a novel potential biomarker for early diagnosis of acute myocardial infarction in humans. | eur heart j. 31(6):659-66.                | 2010 | <a href="#">20159880</a> |
| Wang K et al.       | Export of microRNAs and microRNA-protective protein by mammalian cells.                                         | Nucleic Acids Res. 38(20):7248-59         | 2010 | <a href="#">20615901</a> |
| weber ja et al.     | the microrna spectrum in 12 body fluids.                                                                        | clin chem. 56(11):1733-41.                | 2010 | <a href="#">20847327</a> |
| Xie L et al.        | Cell-free miRNAs may indicate diagnosis and docetaxel sensitivity of tumor cells in malignant effusions.        | BMC Cancer. 10:591.                       | 2010 | <a href="#">21029414</a> |
| zampetaki a et al.  | plasma microrna profiling reveals loss of endothelial mir-126 and other micrnas in type 2 diabetes.             | circ res. 107(6):810-7.                   | 2010 | <a href="#">20651284</a> |
| zhang y et al.      | plasma microrna-122 as a biomarker for viral-, alcohol-, and chemical-related hepatic diseases.                 | clin chem. 56(12):1830-8.                 | 2010 | <a href="#">20930130</a> |
| Zhou Q et al.       | MicroRNA-29a regulates intestinal membrane permeability in patients with irritable bowel syndrome.              | Gut. 59(6):775-84                         | 2010 | <a href="#">19951903</a> |
| Lodes MJ et al.     | Detection of cancer with serum miRNAs on an oligonucleotide microarray.                                         | PLoS One. 4(7):e6229.                     | 2009 | <a href="#">19597549</a> |
| rabinowits g et al. | exosomal microrna: a diagnostic marker for lung cancer.                                                         | clin lung cancer. 10(1):42-6.             | 2009 | <a href="#">19289371</a> |
| Yuan A et al.       | Transfer of microRNAs by embryonic stem cell microvesicles.                                                     | PLoS One. 4(3):e4722                      | 2009 | <a href="#">19266099</a> |
| zhu w et al.        | circulating micrnas in breast cancer and healthy subjects.                                                      | bmc res notes. 2:89                       | 2009 | <a href="#">19454029</a> |
| chim ss et al.      | detection and characterization of placental micrnas in maternal plasma.                                         | clin chem. 54(3):482-90                   | 2008 | <a href="#">18218722</a> |
| gilad s et al.      | serum micrnas are promising novel biomarkers.                                                                   | plos one. 3(9):e3148                      | 2008 | <a href="#">18773077</a> |
| hunter mp et al.    | detection of microrna expression in human peripheral blood microvesicles.                                       | plos one. 3(11):e3694.                    | 2008 | <a href="#">19002258</a> |
| mittchell ps et al. | circulating micrnas as stable blood-based markers for cancer detection.                                         | pnas 105(30):10513-8                      | 2008 | <a href="#">18663219</a> |

|                  |                                                                                                                     |                                  |      |                          |
|------------------|---------------------------------------------------------------------------------------------------------------------|----------------------------------|------|--------------------------|
| Skog J et al.    | Glioblastoma microvesicles transport RNA and proteins that promote tumour growth and provide diagnostic biomarkers. | Nat Cell Biol. 10(12):1470-6     | 2008 | <a href="#">19011622</a> |
| taylor dd et al. | microma signatures of tumor-derived exosomes as diagnostic biomarkers of ovarian cancer.                            | gynecol oncol.110(1):13-21.      | 2008 | <a href="#">18589210</a> |
| Panzitt K et al. | Characterization of HULC, a novel gene with striking up-regulation in hepatocellular carcinoma, as noncoding RNA.   | Gastroenterology. 132(1):330-42. | 2007 | <a href="#">17241883</a> |
| Tinzl M et al.   | DD3/PCA3 RNA analysis in urine--a new perspective for detecting prostate cancer.                                    | Eur Urol. 46(2):182-6            | 2004 | <a href="#">15245811</a> |
| Hessels D et al. | DD3(PCA3)-based molecular urine analysis for the diagnosis of prostate cancer.                                      | Eur Urol. 44(1):8-15             | 2003 | <a href="#">12814669</a> |

**Supplementary Figure S1.** Webpage of the database and search bar. A) Home page; B) Search bar with autocomplete function; C) Overview of the result of the search.

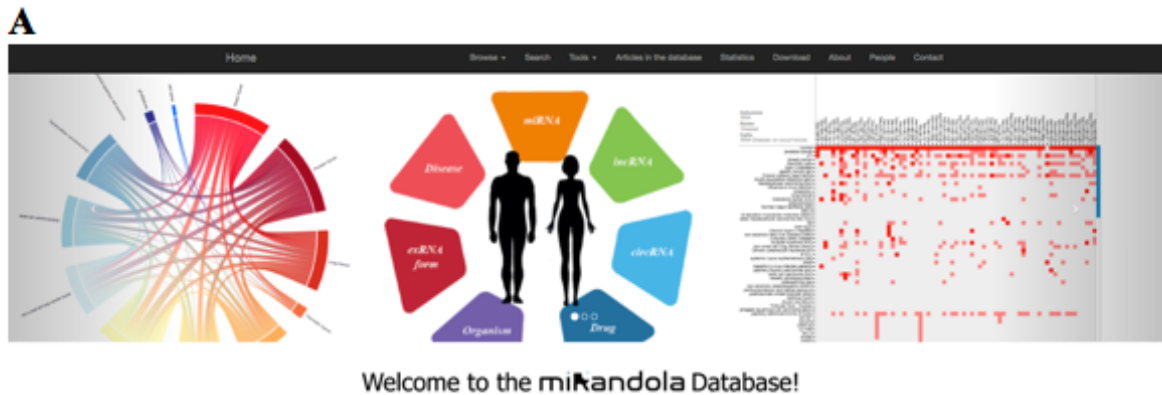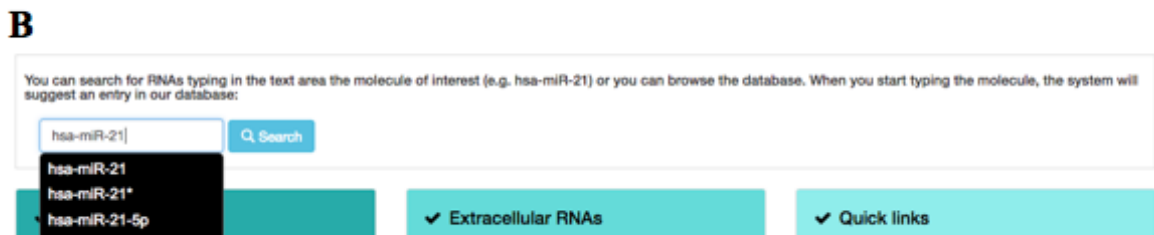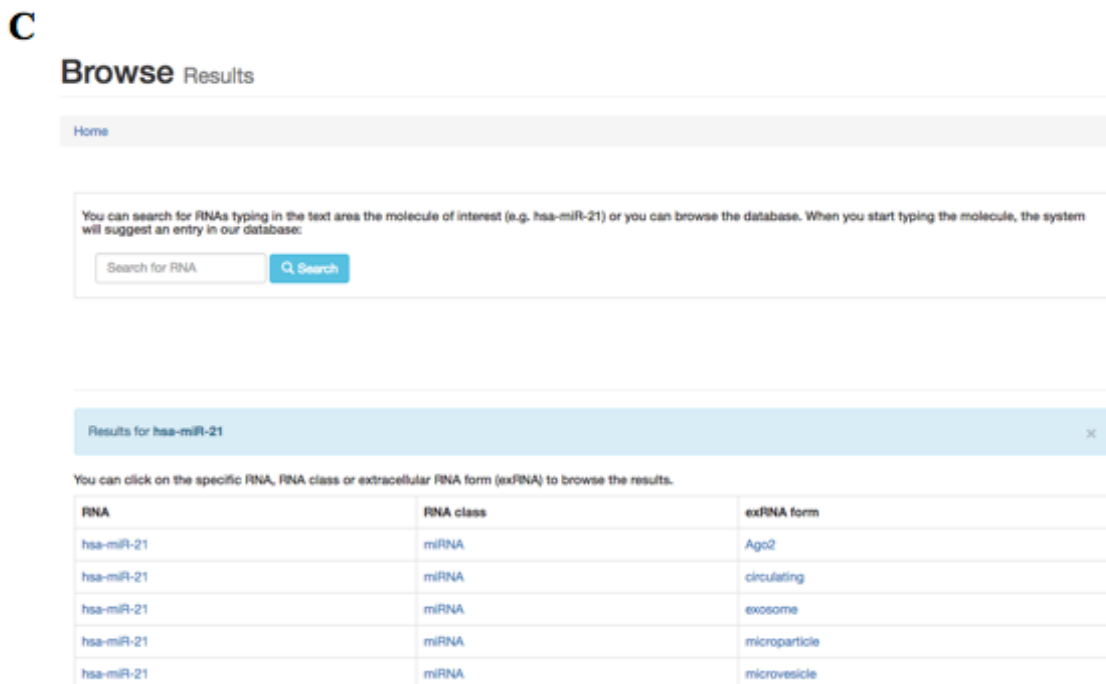

**Supplementary Figure S2.** Users can browse the database by choosing different terms. A) Detail of menu and the Browse section; B) Selection of “microRNAs” and use of the filtering function.

**A**

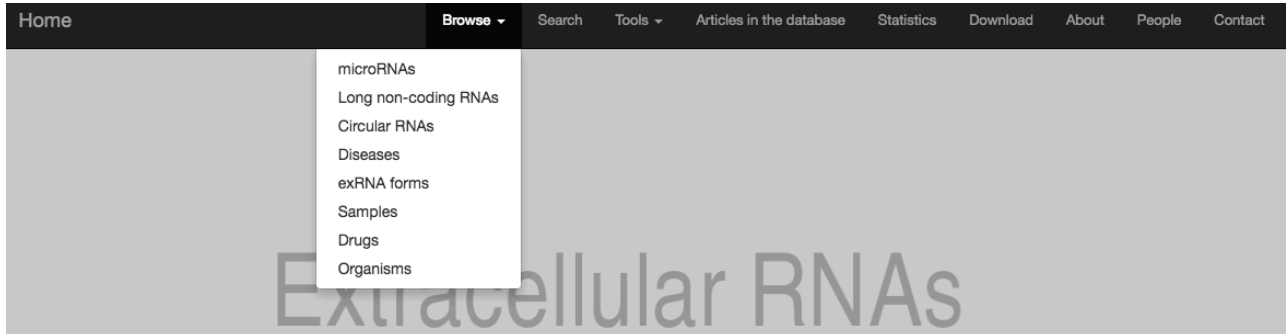

**B**

The screenshot shows the 'Browse microRNA' page. At the top, there is a navigation bar with 'Home', 'Browse', 'Search', 'Tools', 'Articles in the database', 'Statistics', 'Download', 'About', 'People', and 'Contact'. Below the navigation bar, the page title is 'Browse microRNA'. A breadcrumb trail shows 'Home / microRNA'. There are two input fields: 'Per page:' with a dropdown menu set to '50', and 'Filter:' with a text input field containing 'hsa-miR-21'. Below these fields is a table with five columns: 'Mature miRNA ID from literature', 'miRBase ID (last version)', 'miRBase accession', 'miRBase family', and 'Organism'. The table contains three rows of data for hsa-miR-21.

| Mature miRNA ID from literature <a href="#">↑↓</a> | miRBase ID (last version) <a href="#">↑↓</a> | miRBase accession <a href="#">↑↓</a> | miRBase family <a href="#">↑↓</a> | Organism <a href="#">↑↓</a> |
|----------------------------------------------------|----------------------------------------------|--------------------------------------|-----------------------------------|-----------------------------|
| <a href="#">hsa-miR-21</a>                         | hsa-miR-21-5p                                | <a href="#">MIMAT0000076</a>         | mir-21                            | Homo sapiens                |
| <a href="#">hsa-miR-21*</a>                        | hsa-miR-21-3p                                | <a href="#">MIMAT0004494</a>         | mir-21                            | Homo sapiens                |
| <a href="#">hsa-miR-21-5p</a>                      | hsa-miR-21-5p                                | <a href="#">MIMAT0000076</a>         | mir-21                            | Homo sapiens                |



**Supplementary Figure S3.** Search section of the database. In this example, we show the search for *hsa-miR-21* and non-small cell lung cancer.

## Search

Home / Search

You can search for RNA, Disease, Sample of interest typing in the text area the **RNA** (e.g. *hsa-miR-21*), the **Disease** (e.g. *prostate cancer*) or **Sample** (e.g. *plasma*) of interest.

You can also type a combination of RNA AND Disease/RNA AND Sample

When you start typing the system will suggest an entry in our database:

|            |          |                            |          |
|------------|----------|----------------------------|----------|
| RNA        | Q Search |                            |          |
| Disease    | Q Search |                            |          |
| Sample     | Q Search |                            |          |
| hsa-miR-21 | AND      | non small cell lung cancer | Q Search |
| RNA        | AND      | Sample                     | Q Search |

Results for *hsa-miR-21* AND non small cell lung cancer (nscic): 1

x
